# Supplementary material
Source: MDPI journal article supplement (https://www.mdpi.com/2076-3263/11/10/415)
Supplement: s1 [file s1 › geosciences-1364888-supplementary.pdf]

Supplementary material

# Transient Electromagnetic (TEM) Surveys as a First Approach for Characterizing a Regional Aquifer: The Case of the Saint-Narcisse Moraine, Quebec, Canada

**Table S1.** TEM stations, with all nearby boreholes and stratigraphic sections, and their associated electrical resistivity values. Depths are identified by parentheses. The blue color in the electrical resistivity column represents the approximate depths at which the water table has been reached. The water table has been determined by 1) in situ observations and 2) use of the piezometric map

| TEM stations | Boreholes                                                                                                       | Stratigraphic sections                                                                                                                   | Electrical resistivity (Ohm.m)                                                                    | Elevation (m)               | Water table           |
|--------------|-----------------------------------------------------------------------------------------------------------------|------------------------------------------------------------------------------------------------------------------------------------------|---------------------------------------------------------------------------------------------------|-----------------------------|-----------------------|
| L2_ST3       | —                                                                                                               | <b>YL071</b><br>(0-5) sand and gravel<br>(5-11) fine to medium sand                                                                      | (0-5) 625-695<br>(5-11) 465-625                                                                   | ST3: 137<br>YL071: 137      | 11                    |
| L3_ST1       | <b>F1-PACES</b><br>(0-6) medium to coarse sand<br>(6-12) fine to medium sand with silt and clay<br>(12-46) clay | —                                                                                                                                        | (0-6) 350-405<br>(6-12) 110-350<br>(12-46) 15-110                                                 | ST1: 114<br>F1-PACES: 114   | No water              |
| L6_ST5       | —                                                                                                               | <b>YL057</b><br>(0-3): sand and gravel                                                                                                   | (0-3) 610-620                                                                                     | ST5: 120<br>YL057: 120      | No water              |
| L6_ST7       | —                                                                                                               | <b>YL019</b><br>(0-9): sand and gravel with boulders                                                                                     | (0-3) no data<br>(3-9) 430-745                                                                    | ST7: 120<br>YL019: 123      | No water              |
| L7_ST1       | —                                                                                                               | <b>COMP016-18</b><br>(0-11): sand and gravel with pebbles and boulders<br>(11-16): medium to coarse sand<br>(16-18): fine to medium sand | (0-11) 460-720<br>(11-16) 345-460<br><b>(16-18) 170-330</b>                                       | ST1: 139<br>COMP016-18: 139 | 18                    |
| L9_ST5       | <b>ME1843</b><br>(0-13): fine to coarse sand and gravel<br>(13-27): sand<br>(27-30): gravel and clay (till)     | —                                                                                                                                        | (0-13) 540-910<br>(13-27) 215-540<br>(27-30) 200-215                                              | ST5: 180<br>ME1843: 180     | Not available in situ |
| L10_ST1-2    | <b>MAUR0345</b><br>(0-19): sand and gravel                                                                      | —                                                                                                                                        | (0-14) 400-835<br><b>(14-19) 250-400</b>                                                          | ST1-2: 140<br>MAUR0345: 140 | 14                    |
| L10_ST5      | —                                                                                                               | <b>YL080</b><br>(0-12): fine to coarse sand                                                                                              | (0-12) 380-550                                                                                    | ST5: 146<br>YL080: 146      | 14                    |
| L13_ST1      | <b>ME0704</b><br>(0-8): sand and gravel<br>(8-19): sand and gravel with clay<br>(19-27): clay                   | —                                                                                                                                        | <b>(0-8) 150-230</b><br>(8-19) 60-150<br>(19-27) 40-60                                            | ST1: 118<br>ME0954: 118     | 1-2                   |
| L13_ST3      | <b>P12</b><br>(0-9): sand                                                                                       | —                                                                                                                                        | <b>(0-9): 110-150</b>                                                                             | ST3: 118<br>P12: 118        | 1-2                   |
| L15_ST1      | <b>ME1615</b><br>(0-13): sand and gravel<br>(13-38): sand and gravel with clay<br>(38-50): sand and gravel      | —                                                                                                                                        | (0-3): 360-390<br><b>(3-13): 165-360</b><br>(13-38): 80-165<br>(38-50): 150-285                   | ST1: 115<br>ME1615: 114     | 2-3                   |
| L17_ST1      | <b>ME0954</b><br>(0-8): sand and gravel<br>(8-13): sand and gravel<br>(13-17): sand<br>(17-27): sand with clay  | —                                                                                                                                        | (0-2): no data<br>(2-8): 300-415<br><b>(8-13): 180-300</b><br>(13-17): 110-180<br>(17-27): 60-110 | ST1: 116<br>ME0954: 118     | 8                     |

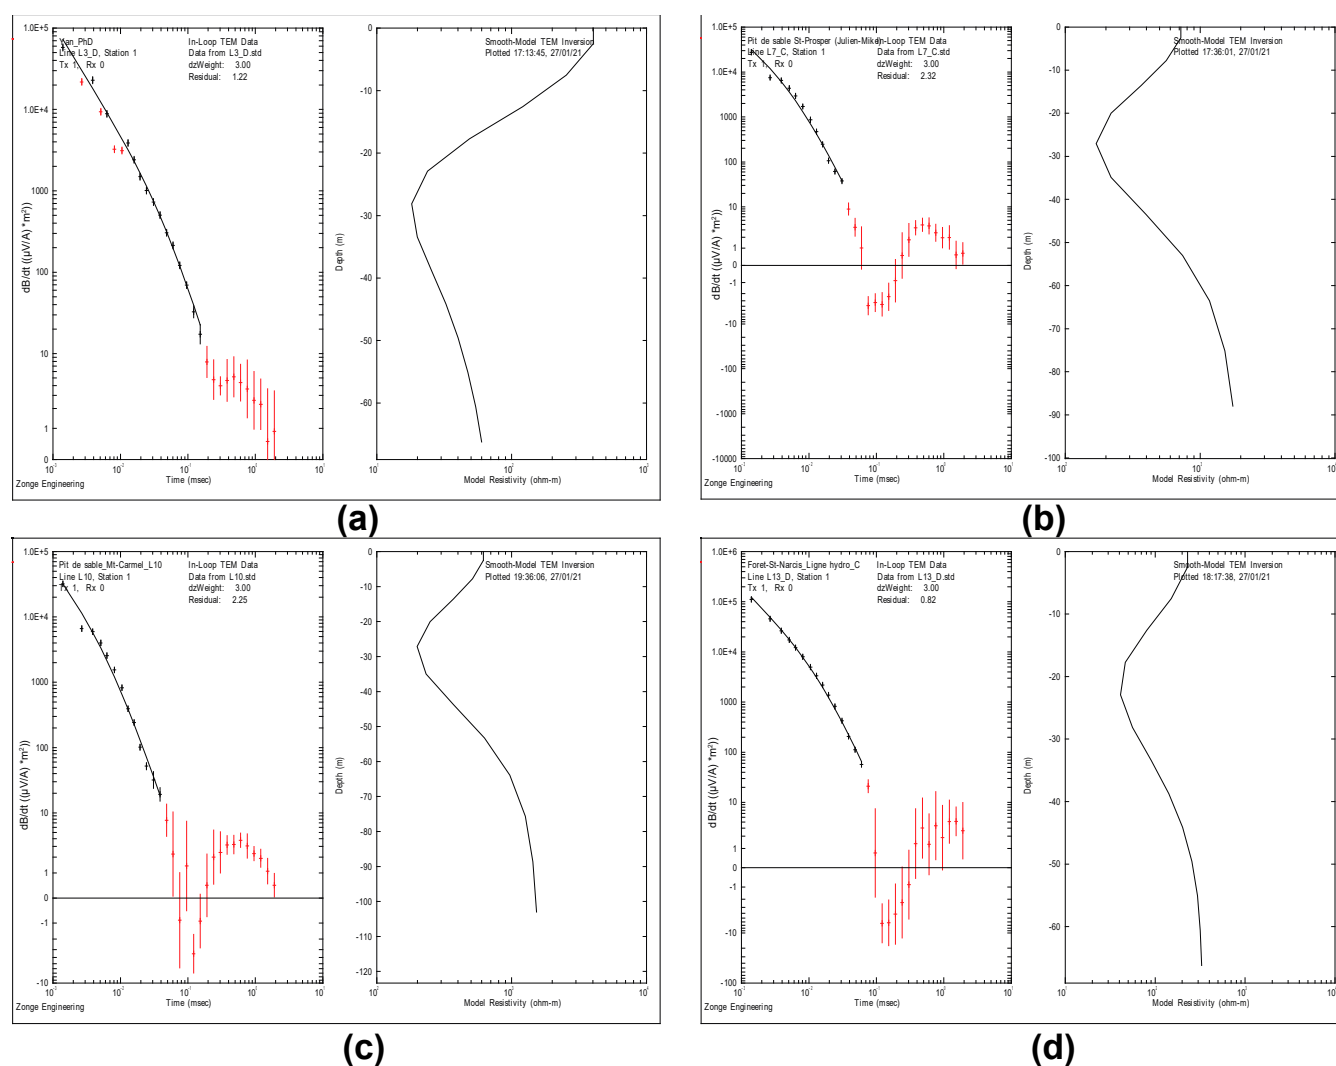

**Figure S1. A. Left:** Typical induced voltage decay from Line 3 (L3), Station 1. Measured data are shown as crosses and inversion fitting as a black line. Noise level is approximately 10  $\mu\text{V/A}$ . The inversion residual is 1.22. **B. Left:** Typical induced voltage decay from Line 7 (L7), Station 1. Measured data are shown as crosses and inversion fitting as a black line. Noise level is approximately 10  $\mu\text{V/A}$ . The inversion residual is 2.32. **C. Left:** Typical induced voltage decay from Line 10 (L10), Station 1. Measured data are shown as crosses and inversion fitting as a black line. Noise level is approximately 10  $\mu\text{V/A}$ . The inversion residual is 2.35. **D. Left:** Typical induced voltage decay from Line 13 (L13), Station 1. Measured data are shown as crosses and inversion fitting as a black line. Noise level is approximately 25  $\mu\text{V/A}$ . The inversion residual is 0.82. **Right for Figure S1A-D:** The obtained smooth model TEM inversion.

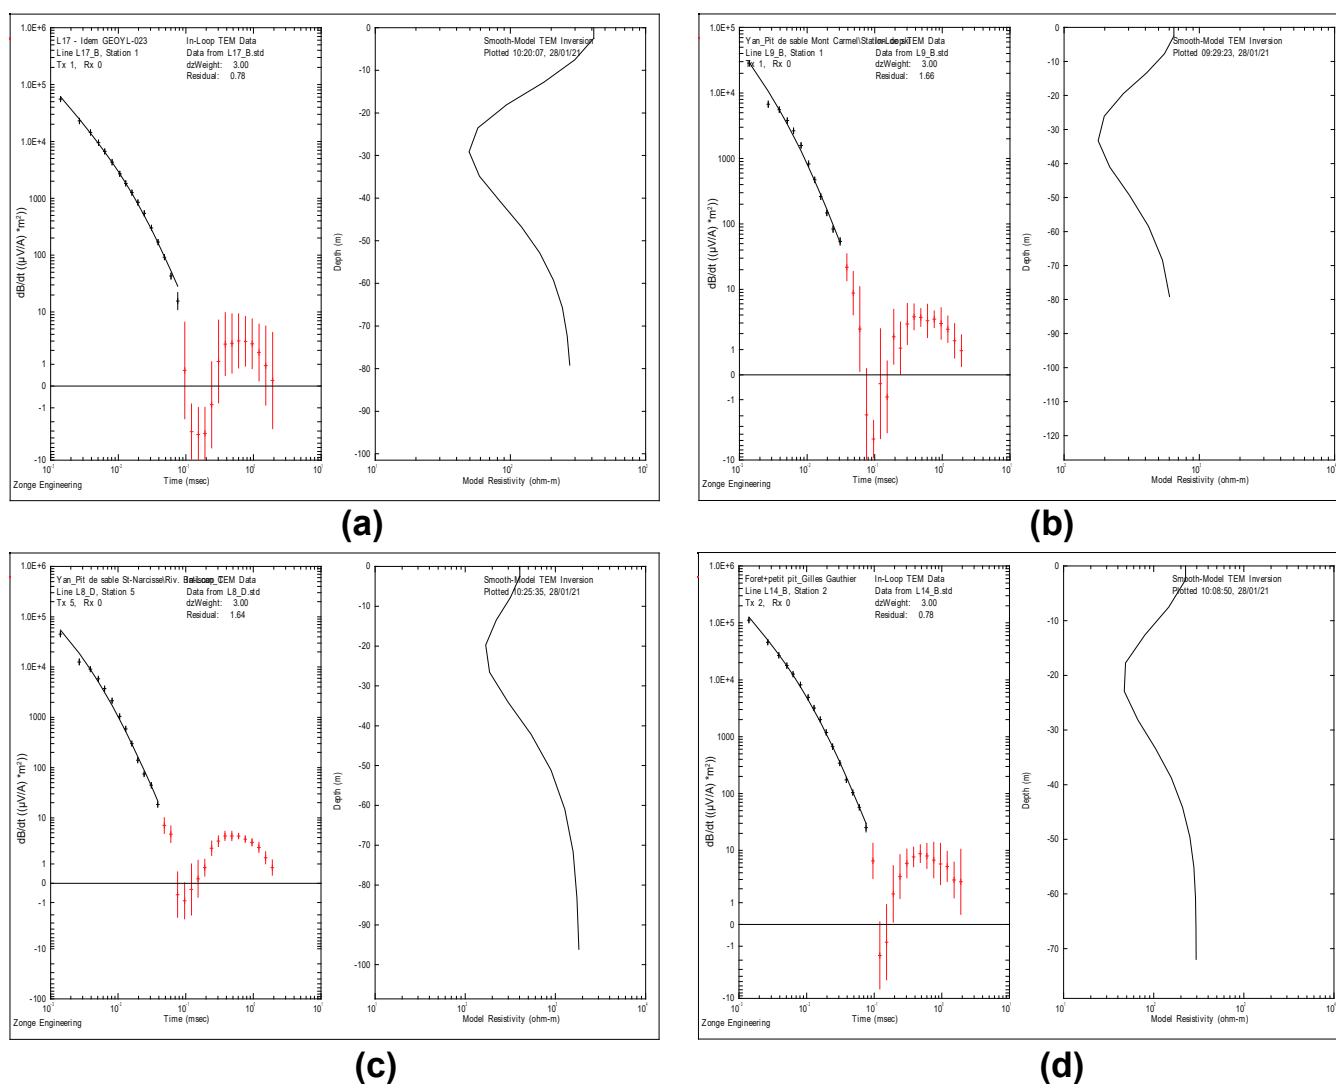

**Figure S2. A. Left:** Typical induced voltage decay from Line 17 (L17), Station 1. Measured data are shown as crosses and inversion fitting as a black line. Noise level is approximately  $8 \mu\text{V/A}$ . The inversion residual is 0.78. **B. Left:** Typical induced voltage decay from Line 9 (L9), Station 1. Measured data are shown as crosses and inversion fitting as a black line. Noise level is approximately  $30 \mu\text{V/A}$ . The inversion residual is 1.66. **C. Left:** Typical induced voltage decay from Line 8 (L8), Station 5. Measured data are shown as crosses and inversion fitting as a black line. Noise level is approximately  $9 \mu\text{V/A}$ . The inversion residual is 1.64. **D. Left:** Typical induced voltage decay from Line 14 (L14), Station 2. Measured data are shown as crosses and inversion fitting as a black line. Noise level is approximately  $10 \mu\text{V/A}$ . The inversion residual is 0.78. **Right for Figure S2A-D:** The obtained smooth model TEM inversion.

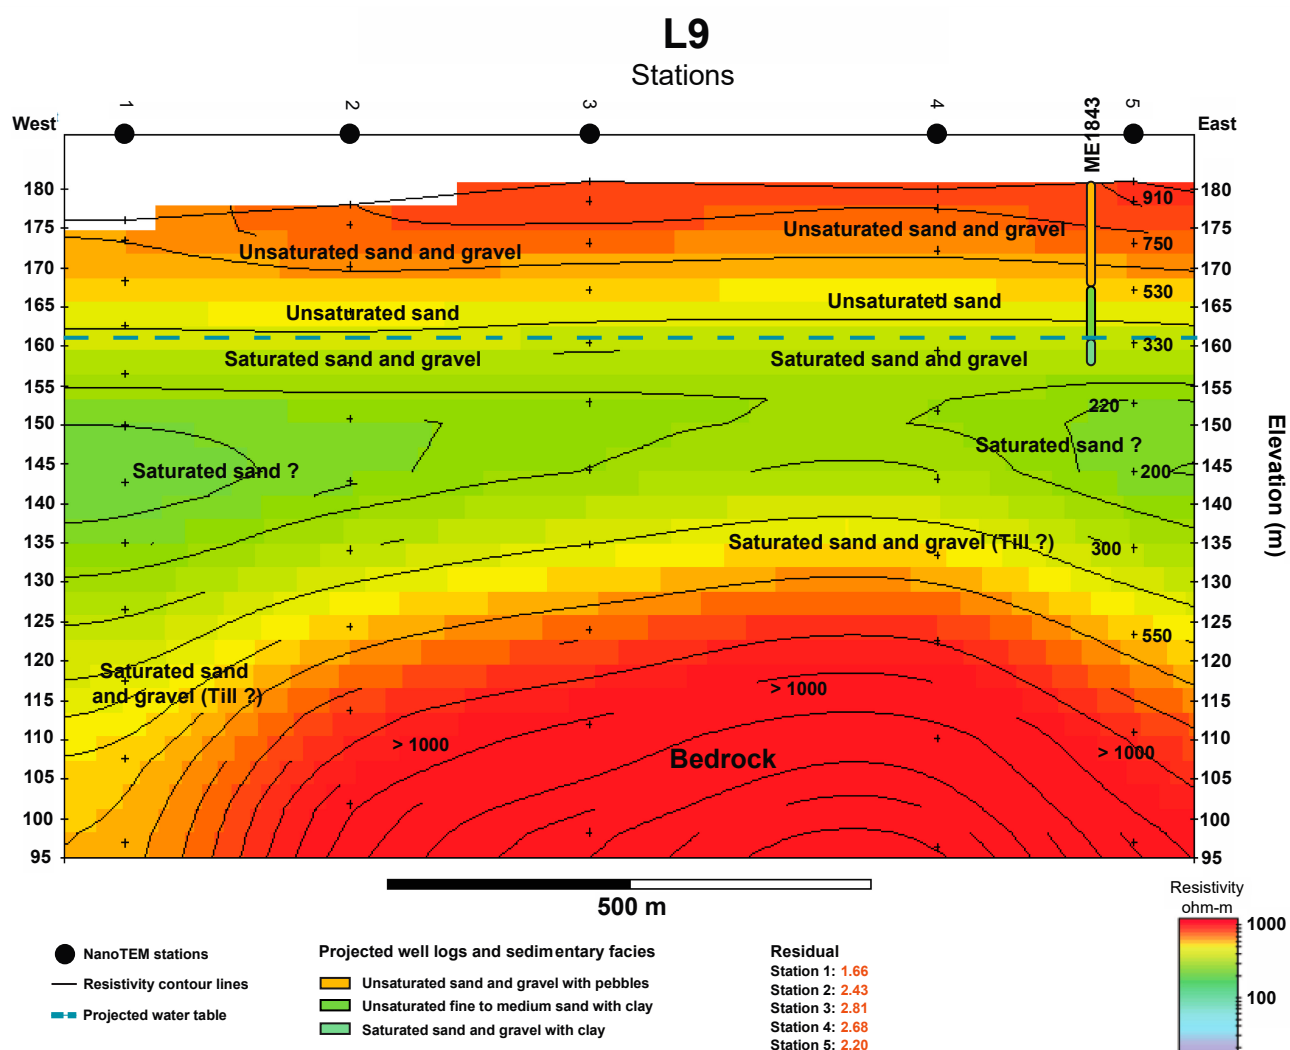

**Figure S3.** Interpreted 2D Section L9 and borehole ME1843 near Notre-Dame-du-Mont-Carmel, Quebec. The surface deposit elevation is obtained from lidar data. The blue dashed line represents the projected water table, and all direct observations have been acquired in the field.

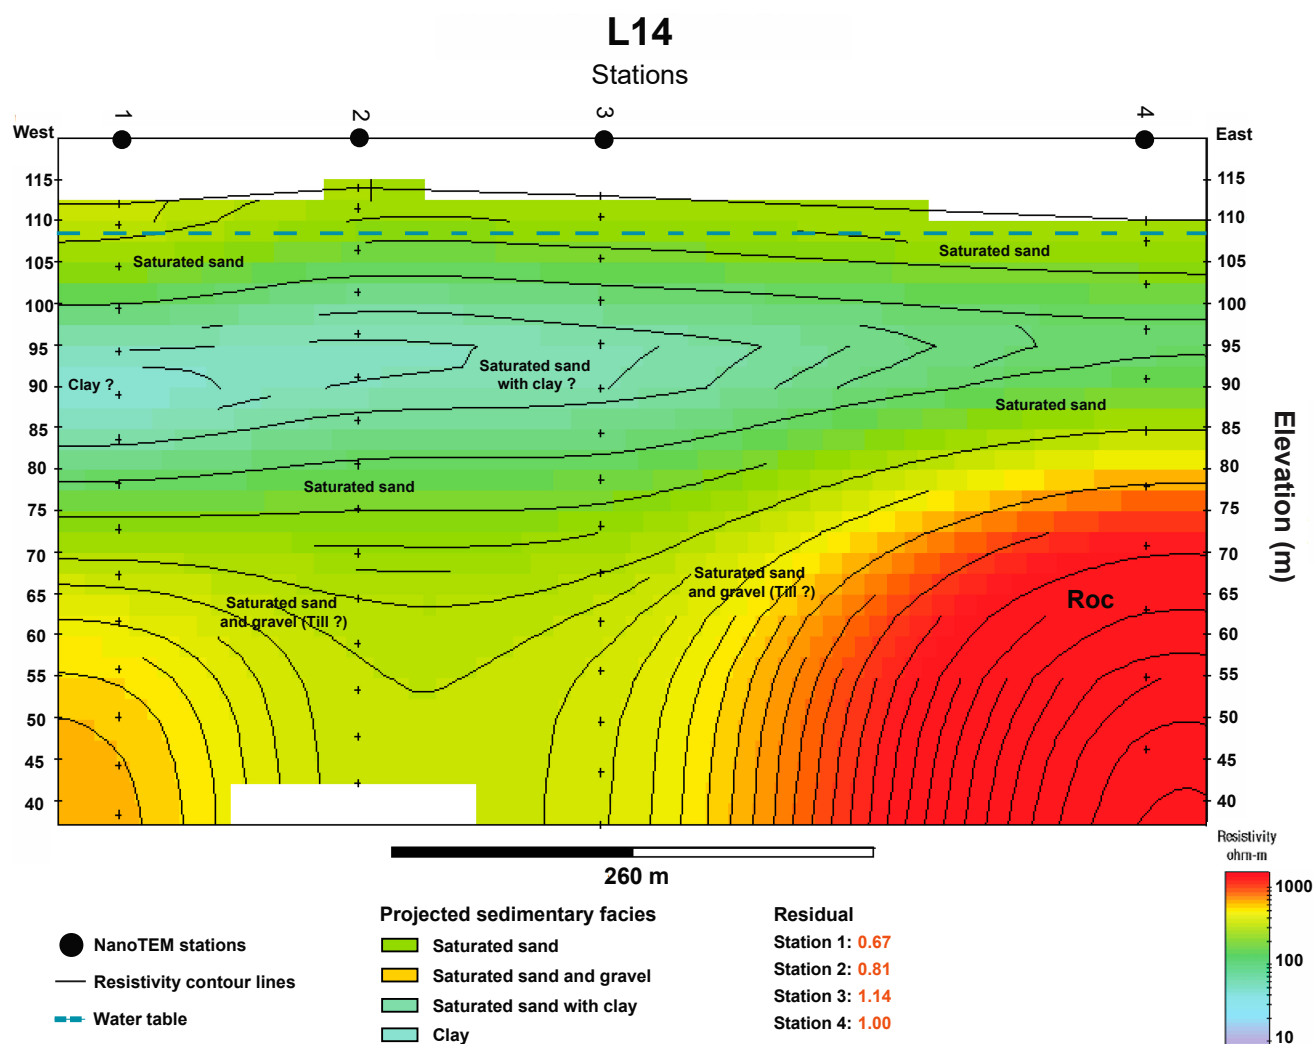

**Figure S4.** Interpreted 2D Section L14 near Saint-Narcisse, Quebec. The surface deposit elevation is obtained from lidar data.

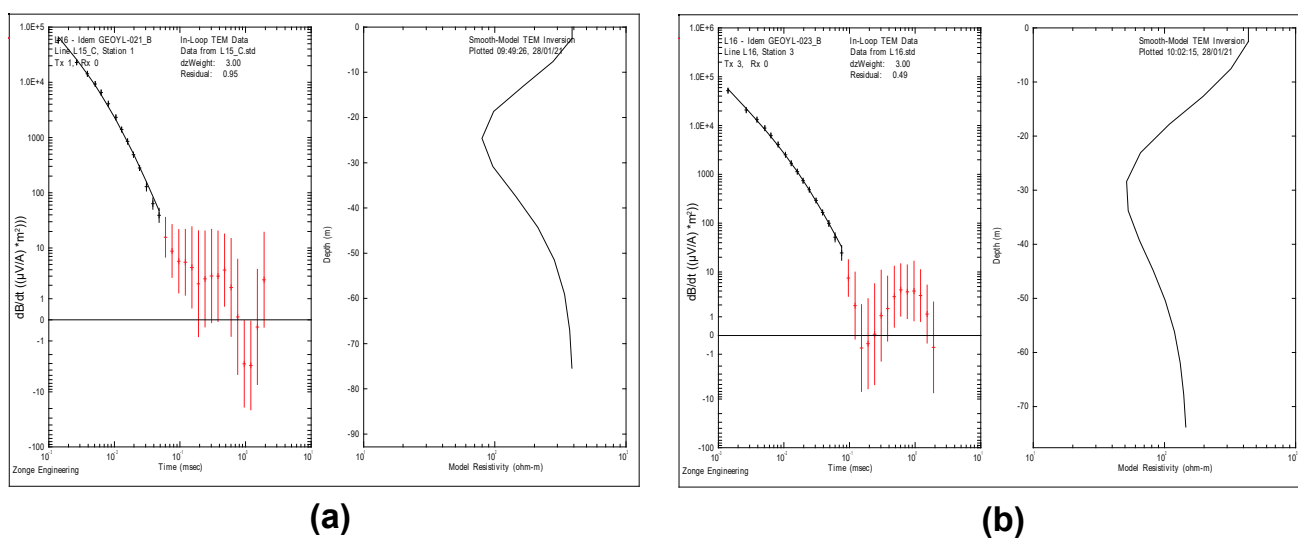

**Figure S5. A. Left:** Typical induced voltage decay from Line 15 (L15), Station 1. Measured data are shown as crosses and inversion fitting as a black line. Noise level is approximately 30  $\mu\text{V/A}$ . The inversion residual is 0.95. **B. Left:** Typical induced voltage decay from Line 16 (L16), Station 3. Measured data are shown as crosses and inversion fitting as a black

line. Noise level is approximately  $15 \mu\text{V/A}$ . The inversion residual is 0.49. **Right for Figure S5A-B:** The obtained smooth model TEM inversion.

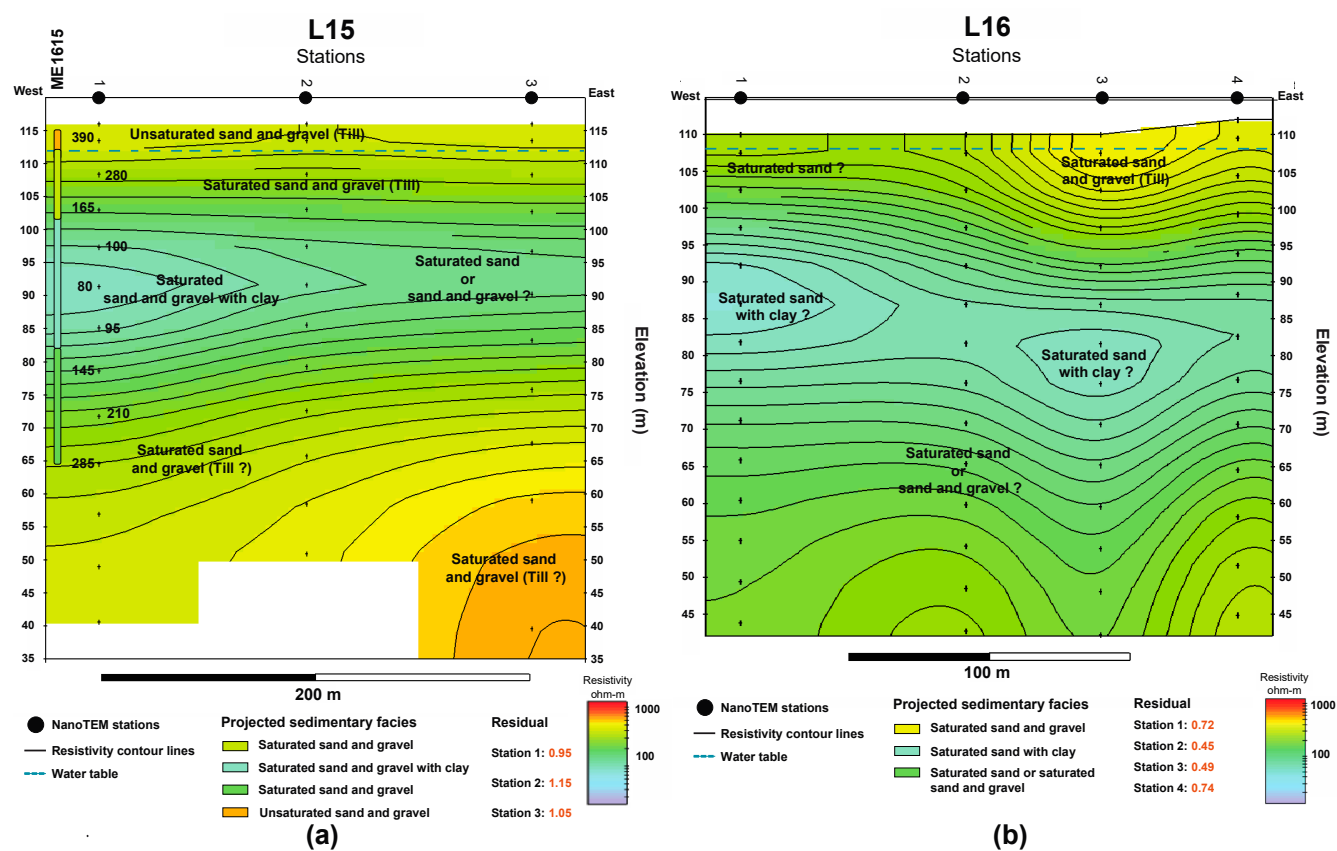

**Figure S6. A.** Interpreted 2D Section L15 near Saint-Narcisse, Quebec. **B.** Interpreted 2D Section L16 near Saint-Narcisse, located approximately 300 m further south of L15. The surface deposit elevation of both sections was obtained from lidar data.
